# Supplementary material for: Polarization genes dominated heteroatom-doped graphene aerogels toward super-efficiency microwave absorption
Source: Royal Society of Chemistry journal article supplement (doi:10.1039/d3tc01965a), 2023-01-01
Supplement: d3tc01965a1.pdf [file d3tc01965a1.pdf]

## **Supporting Information**

### **Polarization genes dominated heteroatoms-doped graphene aerogels toward super-efficiency microwave absorption**

Xiaogu Huang\*, Lan Zhang, Gaoyuan Yu, Jiawen Wei, Gaofeng Shao\*

School of Chemistry and Materials Science, Nanjing University of Information  
Science & Technology, Nanjing 210044, China

\*Corresponding Author:

Xiaogu Huang, Email: [hxg@nuist.edu.cn](mailto:hxg@nuist.edu.cn)

Gaofeng Shao, Email: [gfshao@nuist.edu.cn](mailto:gfshao@nuist.edu.cn)

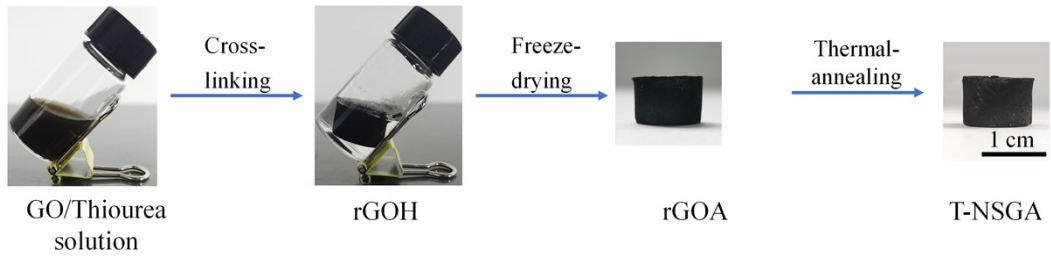

**Fig. S1.** Schematic illustration of the synthesis process of T-NSGA.

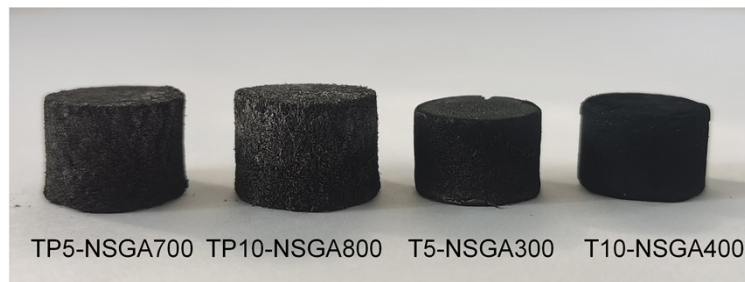

**Figure S2.** Digital images of NSGAs.

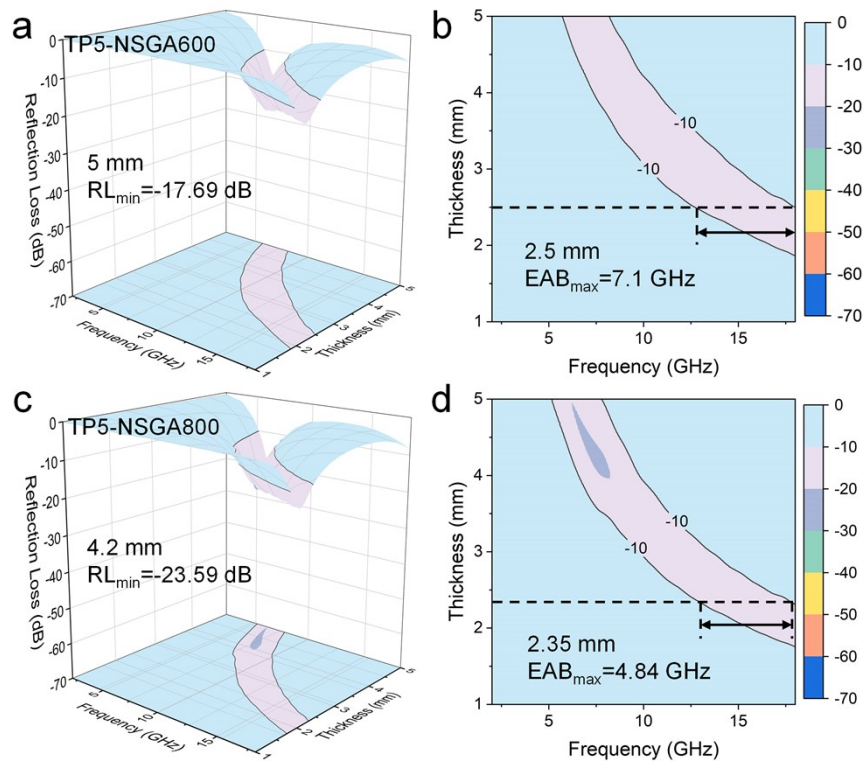

**Figure S3.** 3D RL and contour map of all samples in the frequency range of 2-18 GHz:

(a)-(b) TP5-NSGA600, (c)-(d) TP5-NSGA800.

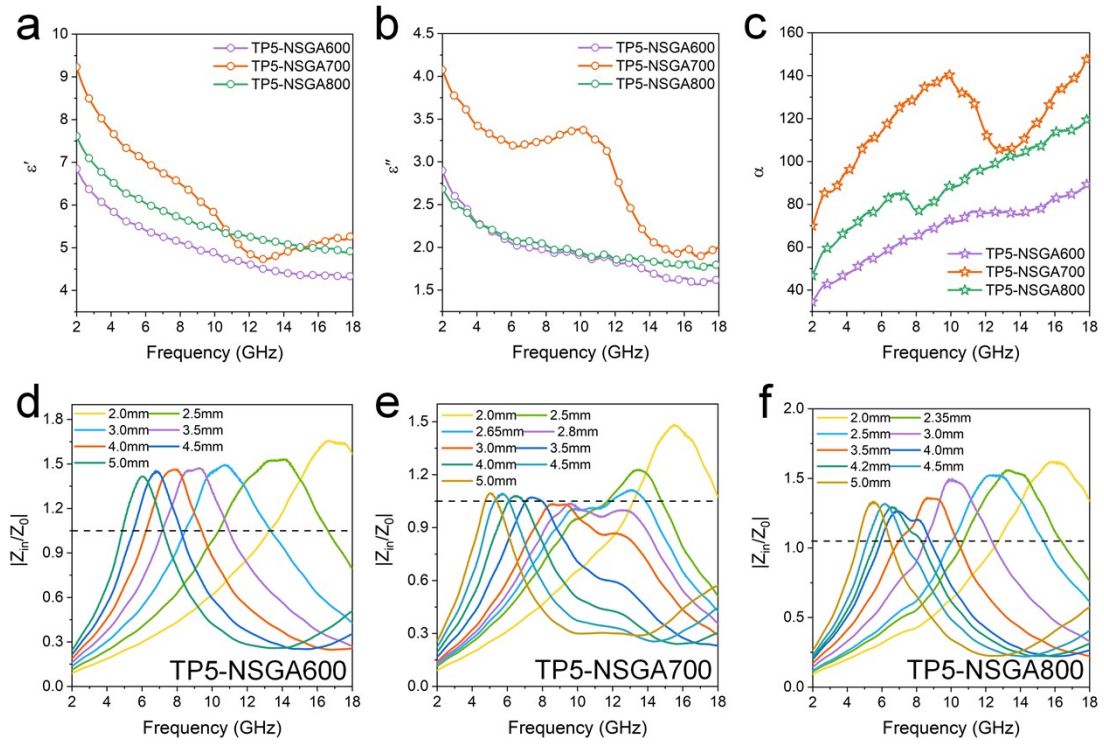

**Figure S4.** (a) Real and (b) imaginary parts of the complex permittivity, (c) attenuation constant, and (d-f) impedance matching for TP5-NSGA600, TP5-NSGA700 and TP5-NSGA800.

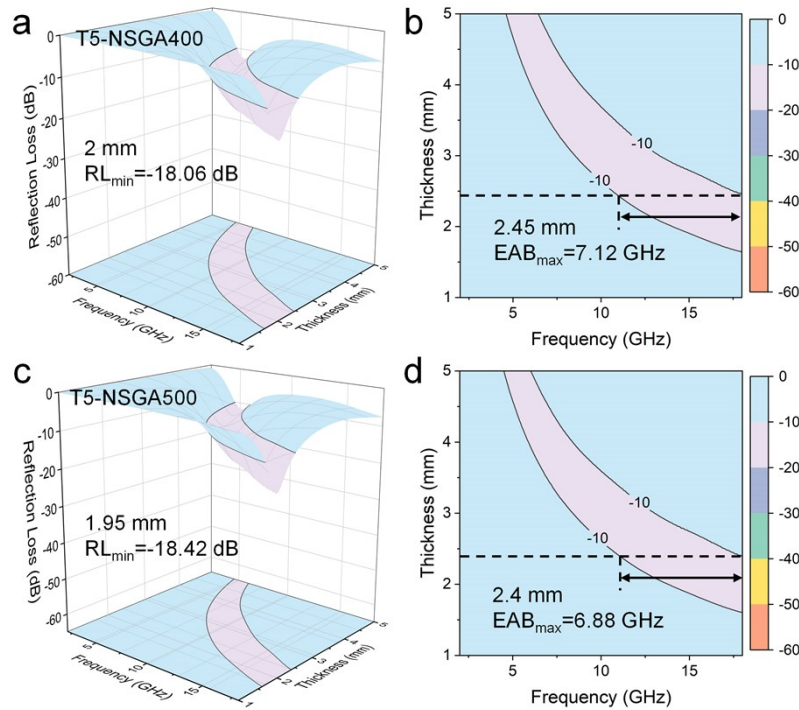

**Figure S5.** 3D RL and contour map of all samples in the frequency range of 2-18 GHz: (a)-(b) T5-NSGA400, (c)-(d) T5-NSGA500.

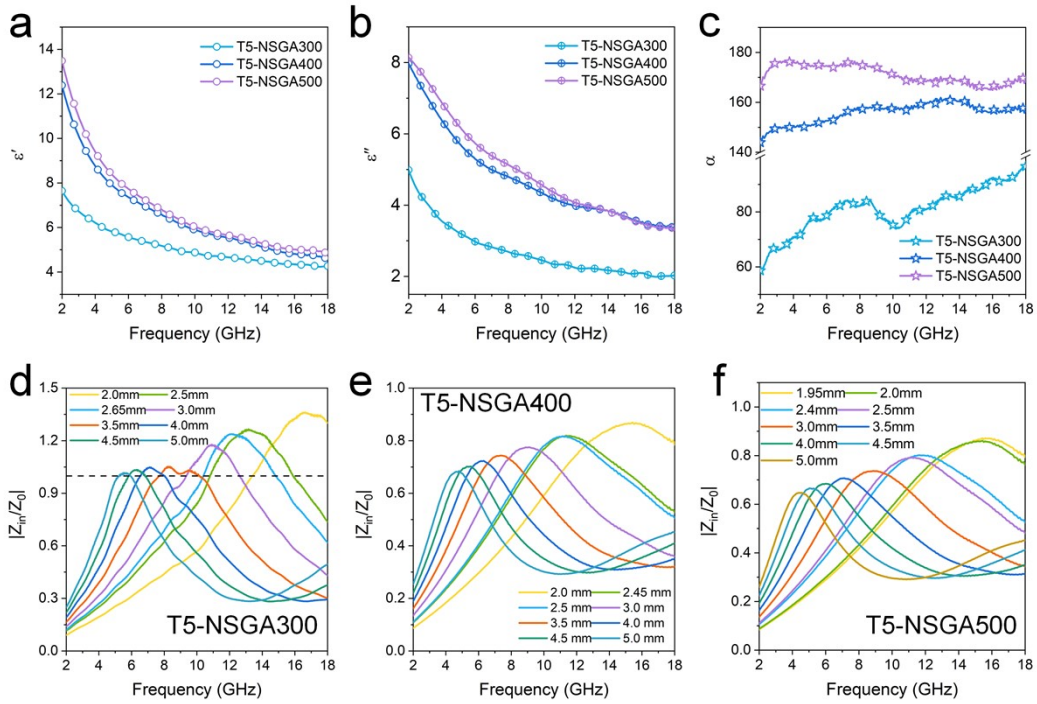

**Figure S6.** (a) Real and (b) imaginary parts of the complex permittivity, (c) attenuation constant, and (d-f) impedance matching for T5-NSGA300, T5-NSGA400 and T5-NSGA500.

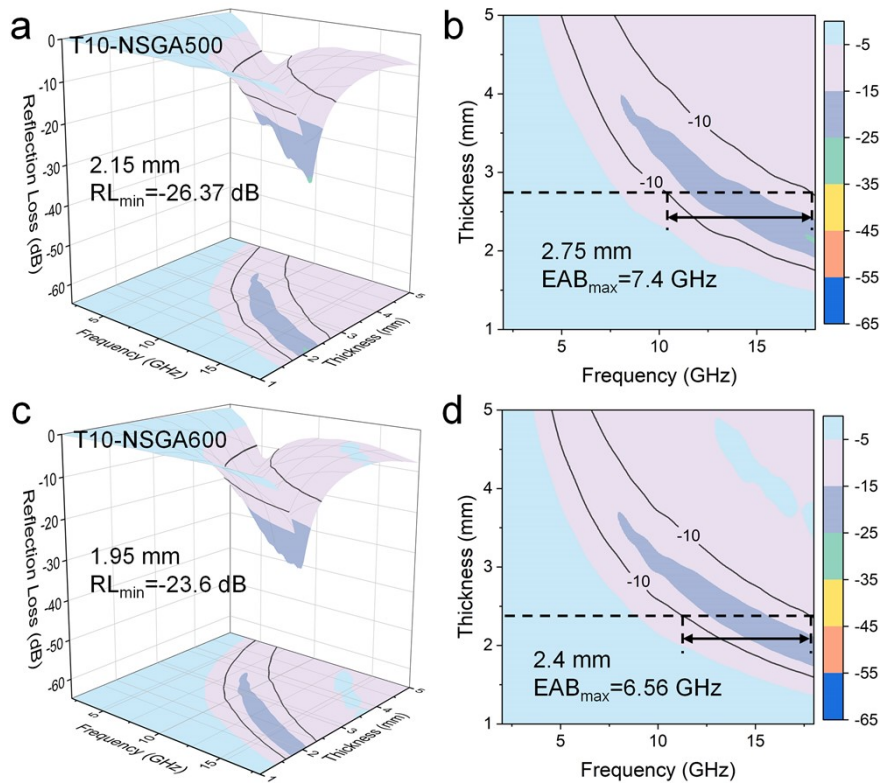

**Figure S7.** 3D RL and contour map of all samples in the frequency range of 2.00-18.00 GHz: (a)-(b) T10-NSGA500, (c)-(d) T10-NSGA600.



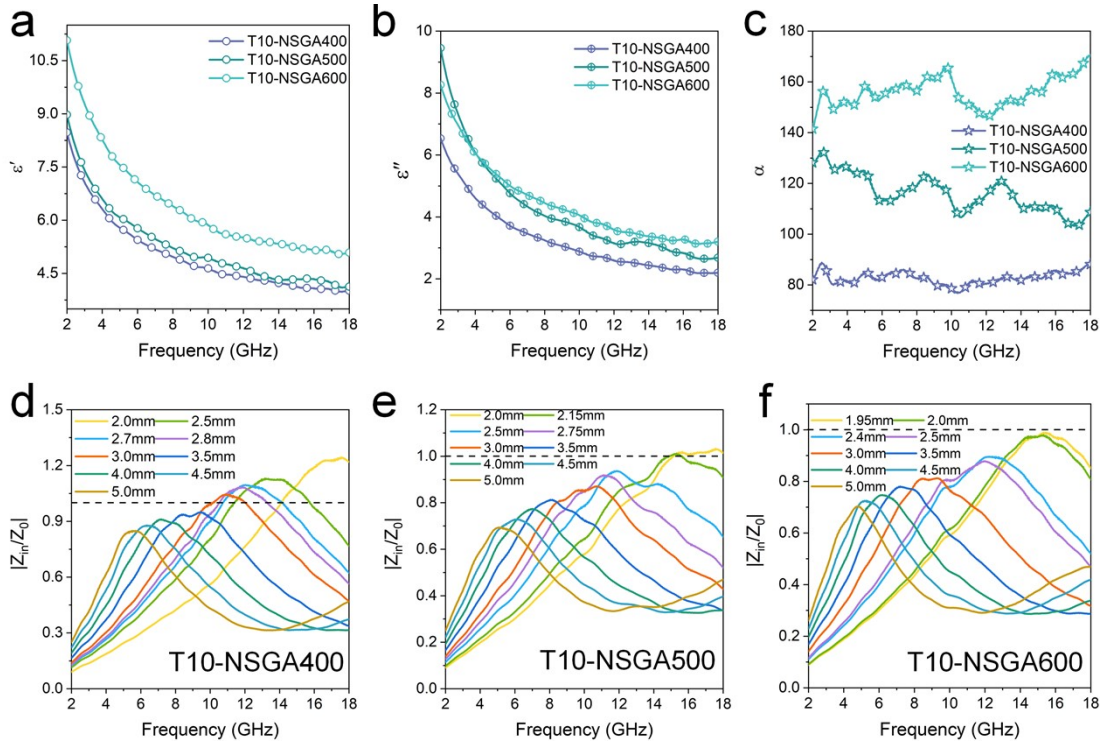

**Figure S8.** (a) Real and (b) imaginary parts of the complex permittivity, (c) attenuation constant, and (d-f) impedance matching for T10-NSGA400, T10-NSGA500 and T10-NSGA600.

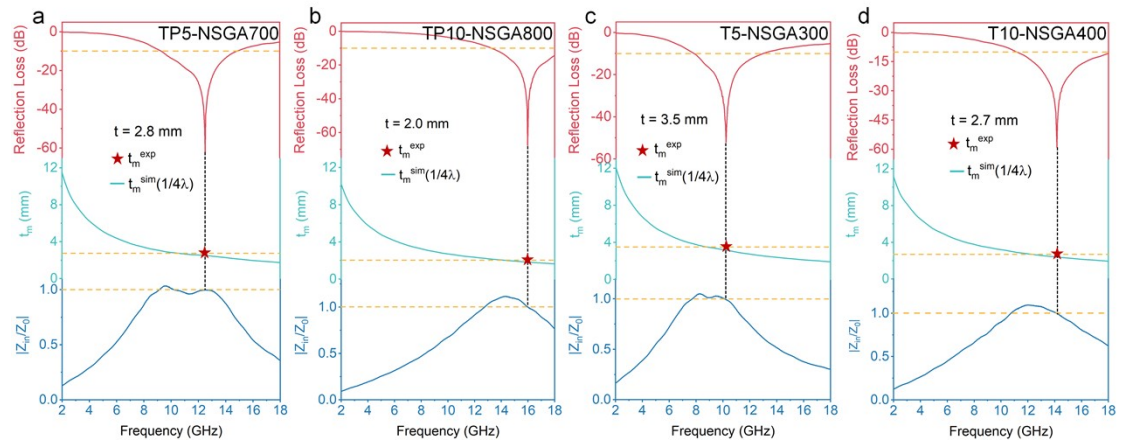

**Figure S9.** RL/ $t_m$ / $Z$ - $f$  curve for the prepared (a) TP5-NSGA700, (b) TP10-NSGA800, (c) T5-NSGA300 and (d) T10-NSGA400 aerogels.

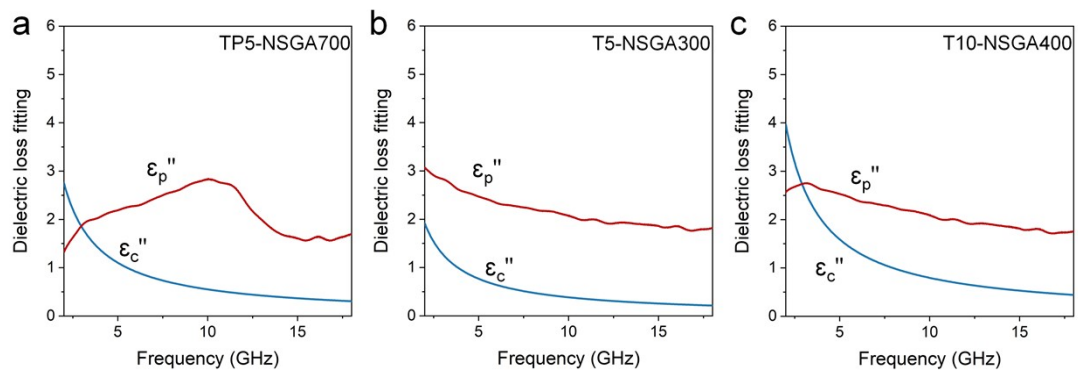

**Figure S10.**  $\epsilon_p''$  and  $\epsilon_c''$  for (a) TP5-NSGA700, (b) T5-NSGA300 and (c) T10-NSGA400.

**Table S1.** The initial weight ratios of pyrrole, thiourea and GO of each NSGA and corresponding density and filling loading of NSGAs.

| <b>NSGAs</b> | <b>GO: Pyrrole<br/>(Weight ratio)</b> | <b>GO: Thiourea<br/>(Weight ratio)</b> | <b>Density<br/>(mg cm<sup>-3</sup>)</b> | <b>Filling loading<br/>(wt%)</b> |
|--------------|---------------------------------------|----------------------------------------|-----------------------------------------|----------------------------------|
| TP5-NSGA600  | 1:2.5                                 | 1:2.5                                  | 3.77                                    | 0.37                             |
| TP5-NSGA700  | 1:2.5                                 | 1:2.5                                  | 3.14                                    | 0.35                             |
| TP5-NSGA800  | 1:2.5                                 | 1:2.5                                  | 2.91                                    | 0.32                             |
| TP10-NSGA700 | 1:5                                   | 1:5                                    | 4.60                                    | 0.53                             |
| TP10-NSGA800 | 1:5                                   | 1:5                                    | 4.08                                    | 0.45                             |
| TP10-NSGA900 | 1:5                                   | 1:5                                    | 3.56                                    | 0.40                             |
| T5-NSGA300   | -                                     | 1:5                                    | 5.64                                    | 0.65                             |
| T5-NSGA400   | -                                     | 1:5                                    | 4.74                                    | 0.56                             |
| T5-NSGA500   | -                                     | 1:5                                    | 4.61                                    | 0.51                             |
| T10-NSGA400  | -                                     | 1:10                                   | 4.19                                    | 0.47                             |
| T10-NSGA500  | -                                     | 1:10                                   | 4.01                                    | 0.46                             |
| T10-NSGA600  | -                                     | 1:10                                   | 3.82                                    | 0.45                             |

**Table S2.** The comparison of EMW absorption performance, specific RL and SMAP of NSGAs with those of the previously reported light-weight absorbers.

| Absorbers                                    | Density/<br>mg cm <sup>-3</sup> | RL <sub>min</sub> /<br>dB | d/<br>mm | EAB/<br>GHz | Content/<br>wt% | Specific RL/<br>dB | SMAP/<br>dB cm <sup>2</sup> g <sup>-1</sup> | Ref       |
|----------------------------------------------|---------------------------------|---------------------------|----------|-------------|-----------------|--------------------|---------------------------------------------|-----------|
| TP5-NSGA700                                  | 3.14                            | -62.11                    | 2.8      | 5.64        | 0.35            | <i>17746</i>       | <i>70644</i>                                | This work |
| TP10-NSGA800                                 | 4.08                            | -67.64                    | 2        | 6.12        | 0.45            | <i>15031</i>       | <i>82892</i>                                | This work |
| T5-NSGA300                                   | 5.64                            | -52.06                    | 3.5      | 6.48        | 0.65            | <i>8009</i>        | <i>26373</i>                                | This work |
| T10-NSGA400                                  | 4.19                            | -58.98                    | 2.7      | 7.12        | 0.47            | <i>12548</i>       | <i>54134</i>                                | This work |
| <b>Atom-doped GA</b>                         |                                 |                           |          |             |                 |                    |                                             |           |
| NGF                                          | 11.6                            | -53.9                     | 3.5      | 4.56        | 5               | <i>1078</i>        | <i>13276</i>                                | [S1]      |
| NRGA                                         | 8.7                             | -56.4                     | 2        | 6.8         | 6               | <i>940</i>         | <i>32414</i>                                | [S2]      |
| CoGA                                         | 8.8                             | -49.13                    | 1.5      | 4.24        | 5               | <i>983</i>         | <i>37220</i>                                | [S3]      |
| M-NCx                                        | —                               | -46.2                     | 2        | 4.7         | 10              | <i>462</i>         | —                                           | [S4]      |
| <b>Multi-component GA</b>                    |                                 |                           |          |             |                 |                    |                                             |           |
| FeNi@NC/<br>NCNT/N-RGOA                      | 13.1                            | -39.39                    | 2        | 4.7         | 10              | <i>394</i>         | <i>15034</i>                                | [S5]      |
| Ni/MXene/RGOA                                | 6.45                            | -75.2                     | 2.15     | 7.3         | 0.64            | <i>11750</i>       | <i>54227</i>                                | [S6]      |
| Fe <sub>3</sub> O <sub>4</sub> /MWCNT/G<br>F | 5                               | -35.30                    | 3        | 9.01        | 10              | <i>353</i>         | <i>23533</i>                                | [S7]      |
| CoNiFe/GA                                    | 8.92                            | -66.23                    | 2.6      | 6.6         | 1.1             | <i>6020</i>        | <i>28557.26</i>                             | [S8]      |
| Fe <sub>3</sub> O <sub>4</sub> @C/RGOA       | 6.2                             | -58.1                     | 2.5      | 7.84        | 0.7             | <i>8300</i>        | <i>37483.87</i>                             | [S9]      |
| <b>Dielectric GA</b>                         |                                 |                           |          |             |                 |                    |                                             |           |
| TCNF/GA                                      | 13.7                            | -46.1                     | 3.5      | 7.1         | 3.4             | <i>1356</i>        | <i>9614</i>                                 | [S10]     |
| ATO/RGOA                                     | 10                              | -40.92                    | 3.3      | 9.8         | 1.2             | <i>3410</i>        | <i>12400</i>                                | [S11]     |
| PPy/GA                                       | 20                              | -51.1                     | 3        | 5.9         | 50              | <i>102</i>         | <i>8517</i>                                 | [S12]     |
| MWCNT/NRGO<br>A                              | 10.8                            | -69.6                     | 1.8      | 4.3         | 8               | <i>870</i>         | <i>35802</i>                                | [S13]     |
| RGO/GONRA                                    | 8                               | -63.52                    | 2.7      | 8.45        | 1               | <i>6352</i>        | <i>29407.41</i>                             | [S14]     |
| RGO-BPSiA                                    | 56.6                            | -51.2                     | 3.25     | 8.4         | 6.2             | <i>825.81</i>      | <i>2783.36</i>                              | [S15]     |
| CuS@RGOA                                     | 15.2                            | -60.3                     | 3.5      | 7.84        | 0.7             | <i>8614</i>        | <i>11334.59</i>                             | [S16]     |



|                             |      |        |       |      |      |                |                 |       |
|-----------------------------|------|--------|-------|------|------|----------------|-----------------|-------|
| <b>G/CFA</b>                | 4.74 | -25.5  | 13.12 | 8.72 | 0.44 | <b>5795.45</b> | <b>4100.42</b>  | [S17] |
| <b>N-BCMT/RGOA</b>          | 12.1 | -55.45 | 3.0   | 8.36 | 2    | <b>2772.5</b>  | <b>15275.48</b> | [S18] |
| <b>N-CQD/RGOA</b>           | 4.24 | -69.42 | 4.09  | 7.36 | 5    | <b>1388.4</b>  | <b>40030.91</b> | [S19] |
| <b>Magnetic GA</b>          |      |        |       |      |      |                |                 |       |
| <b>RGO/MnO<sub>x</sub>A</b> | 11.2 | -56.21 | 3.44  | 7.04 | 10   | <b>562</b>     | <b>14589</b>    | [S20] |
| <b>CoNi-NGA</b>             | 10.9 | -43.83 | 3     | 4.24 | 8    | <b>55</b>      | <b>13403</b>    | [S21] |
| <b>NIDG</b>                 | —    | -48.68 | 4.5   | 4.56 | 6.2  | <b>785.16</b>  | —               | [S22] |
| <b>GA@Ni</b>                | —    | -52.3  | 3     | 6.7  | 4.25 | <b>1230.59</b> | —               | [S23] |
| <b>Ni/GF</b>                | —    | -29.2  | 2.60  | 5.0  | 1    | <b>2920</b>    | —               | [S24] |
| <b>Pure GA</b>              |      |        |       |      |      |                |                 |       |
| <b>RGOA</b>                 | 5.83 | -61.63 | 3.3   | 7.75 | 0.74 | <b>8328</b>    | <b>32034</b>    | [S25] |
| <b>GA</b>                   | 6.4  | -61.09 | 4.81  | 6.3  | 30   | <b>204</b>     | <b>20851</b>    | [S26] |

## References

1. P. Liu, Y. Zhang, J. Yan, Y. Huang, L. Xia and Z. Guang, *Chem. Eng. J.*, 2019, **368**, 285-298.
2. R. Shu, G. Zhang, C. Zhang, Y. Wu and J. Zhang, *Adv. Electron. Mater.*, 2020, **7**, 2001001.
3. J. Xu, M. Liu, X. Zhang, B. Li, X. Zhang, X. Zhang, C. Zhu and Y. Chen, *Appl. Phys. Rev.*, 2022, **9**, 011402.
4. X. Zhang, Y. Shi, J. Xu, Q. Ouyang, X. Zhang, C. Zhu, X. Zhang and Y. Chen, *Nano-Micro Lett.*, 2021, **14**, 27.
5. J. Xu, X. Zhang, H. Yuan, S. Zhang, C. Zhu, X. Zhang and Y. Chen, *Carbon*, 2020, **159**, 357-365.
6. L. Liang, Q. Li, X. Yan, Y. Feng, Y. Wang, H. B. Zhang, X. Zhou, C. Liu, C. Shen and X. Xie, *ACS Nano*, 2021, **15**, 6622-6632.
7. L. Shi, Y. Zhao, Y. Li, X. Han and T. Zhang, *Appl. Surf. Sci.*, 2017, **416**, 329-337.
8. J. Wei, G. Shao, L. Zhang and X. Huang, *J. Colloid Interface Sci.*, 2023, **631**, 66-77.
9. X. Huang, J. Wei, Y. Zhang, B. Qian, Q. Jia, J. Liu, X. Zhao and G. Shao, *Nano-Micro Lett.*, 2022, **14**, 107.
10. S. Kang, S. Qiao, Y. Cao, Z. Hu, J. Yu and Y. Wang, *Chem. Eng. J.*, 2022, **433**, 133619.
11. J. Li, Z. Xu, T. Li, D. Zhi, Y. Chen, Q. Lu, J. Wang, Q. Liu and F. Meng, *Compos. B. Eng.*, 2022, **231**, 109565.
12. B. Liu, J. Li, L. Wang, J. Ren and Y. Xu, *Compos. Pt. A-Appl. Sci. Manuf.*, 2017, **97**, 141-150.
13. R. Shu, Z. Wan, J. Zhang, Y. Wu, Y. Liu, J. Shi and M. Zheng, *ACS Appl. Mater. Interfaces*, 2020, **12**, 4689-4698.
14. Y. Cheng, X. Sun, S. Yang, D. Wang, L. Liang, S. Wang, Y. Ning, W. Yin and Y. Li, *Chem. Eng. J.*, 2023, **452**, 139376.
15. G. Shao, X. Shen and X. Huang, *ACS Mater. Lett.*, 2022, **4**, 1787-1797.
16. Y. Wu, Y. Zhao, M. Zhou, S. Tan, R. Peymanfar, B. Aslibeiki and G. Ji, *Nano-Micro Lett.*, 2022, **14**, 171.
17. Y. Cao, Z. Cheng, R. Wang, X. Liu, T. Zhang, F. Fan and Y. Huang, *Carbon*, 2022, **199**, 333-346.
18. P. Wu, Y. Feng, J. Xu, Z. Fang, Q. Liu and X. Kong, *Carbon*, 2023, **202**, 194-203.
19. J. Qiu, J. Liao, G. Wang, R. Du, N. Tsidaeva and W. Wang, *Chem. Eng. J.*, 2022, **443**, 136475.
20. H. Chen, S. Bai, S. Li, F. Huang, Y. Lu, L. Wang and H. Zhang, *J. Alloy. Compd.*, 2019, **773**, 980-987.
21. J. Xu, Y. Shi, X. Zhang, H. Yuan, B. Li, C. Zhu, X. Zhang and Y. Chen, *J. Mater. Chem. C*, 2020, **8**, 7847-7857.
22. T. Wu, X. Hu, C. Shao, Z. Cao, C. Li, S. Gao, X. Ren, C. Ding, G. Wen, X. Huang and S. Wu, *J. Colloid Interface Sci.*, 2023, **629**, 44-52.

23. D. Xu, S. Yang, P. Chen, Q. Yu, X. Xiong and J. Wang, *Carbon*, 2019, **146**, 301-312.
24. L. Xiong, M. Yu, J. Liu, S. Li and B. Xue, *RSC Adv.*, 2017, **7**, 14733-14741.
25. X. Huang, G. Yu, Y. Zhang, M. Zhang and G. Shao, *Chem. Eng. J.*, 2021, **426**, 131894.
26. Z. Wang, R. Wei, J. Gu, H. Liu, C. Liu, C. Luo, J. Kong, Q. Shao, N. Wang, Z. Guo and X. Liu, *carbon*, 2018, **139**, 1126-1135.
